# Supplementary material
Source: publisher site journal article supplement (https://www.dovepress.com/article/210834)
Supplement: Supplementary file 1 [file get_supplementary_file.php]

**Supplementary material**


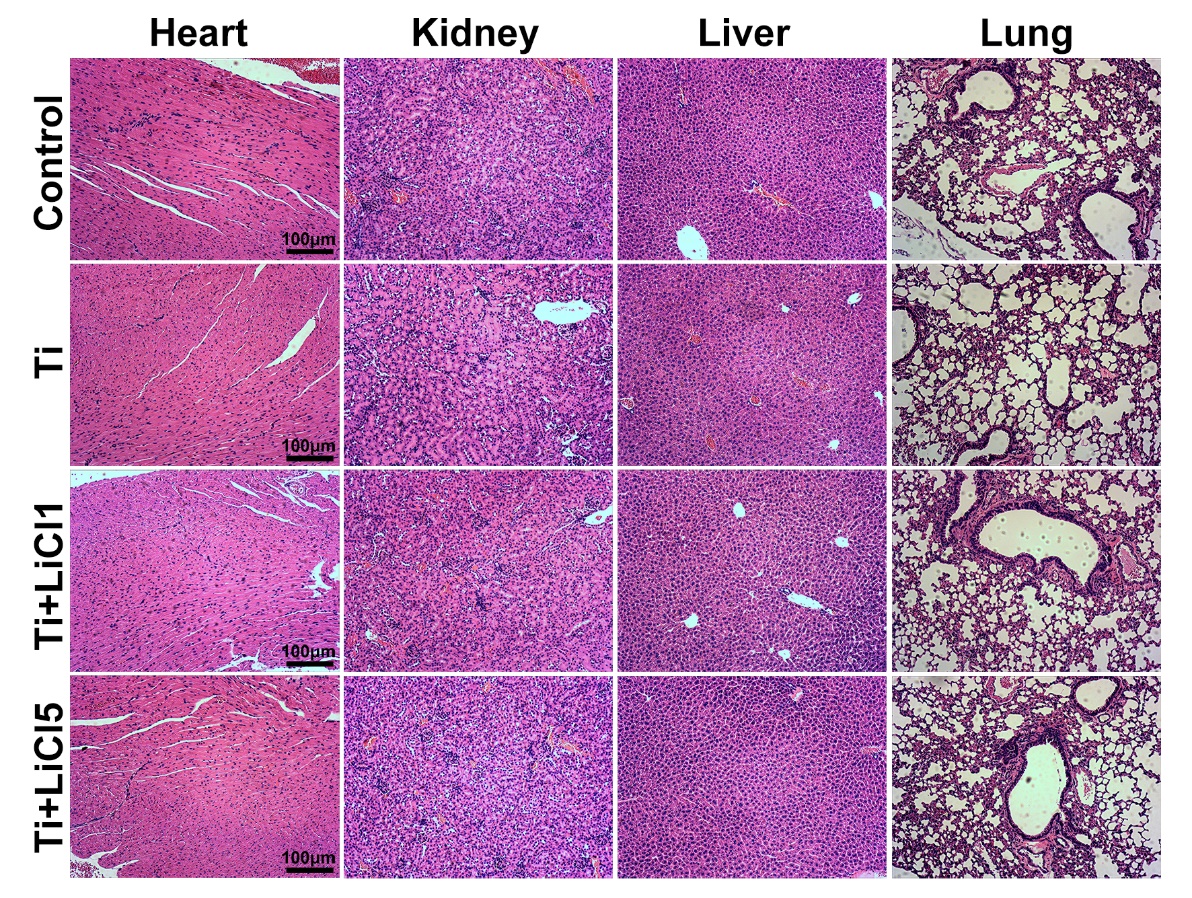


**Figure S1.** Hematoxylin and eosin staining images of major organs

**Notes:** The heart, kidney, liver, and lung of mice were harvested and fixed to evaluate the bio-safety of LiCl on major organs. Sections of major organs were subjected to hematoxylin and eosin staining; scale bar: 100 μm.

**Abbreviations:** LiCl, lithium chloride.
